# Supplementary material
Source: HighWire-hosted journal article supplement (https://cancerres.aacrjournals.org/content/suppl/2009/04/06/0008-5472.CAN-08-2515)
Supplement: stab_2.pdf [file stab_2.pdf]

Table SII

The correlation between integrin-regulated proteins and human cancers

| Protein Symbol | Breast | Lung | Prostate | Ovary | Pancrease | Other |
|----------------|--------|------|----------|-------|-----------|-------|
| AFF4           |        |      |          |       |           | √     |
| AKT1S1         |        |      |          |       |           | √     |
| ANKHD1         | √      |      |          |       |           |       |
| ARHGAP11A      | √      |      |          |       |           |       |
| ARHGEF12       |        |      |          |       |           | √     |
| ARID1A         |        | √    |          |       |           |       |
| BCAR3          |        | √    |          |       |           |       |
| BCL9           |        |      |          |       |           | √     |
| CCDC6          |        |      |          |       |           | √     |
| CENPC1         |        | √    |          |       |           |       |
| CLSPN          | √      | √    |          |       |           |       |
| CSNK1D         | √      |      |          |       |           |       |
| CTNND1         | √      |      |          |       |           |       |
| CXorf15        |        | √    |          |       |           |       |
| DBF4           |        | √    |          |       |           |       |
| DIDO1          |        |      |          |       |           | √     |
| EGFR           | √      | √    | √        |       | √         |       |
| FIP1L1         |        |      |          |       |           | √     |
| GRK6           | √      |      |          |       |           |       |
| HDAC7A         |        | √    |          |       |           |       |
| HN1L           |        |      |          |       |           | √     |

|          |   |   |   |   |   |   |
|----------|---|---|---|---|---|---|
| HNRPA2B1 |   |   |   |   |   | √ |
| KIAA1303 |   | √ |   |   |   |   |
| LASP1    |   |   |   |   |   | √ |
| MAP7     |   |   |   |   |   | √ |
| MAST2    | √ |   |   | √ |   |   |
| MCF2L    |   |   |   |   |   | √ |
| MCM3AP   |   | √ |   |   |   |   |
| MEF2C    |   | √ |   |   |   |   |
| MLL      |   | √ |   |   |   |   |
| MTA1     |   |   |   |   |   | √ |
| MTUS1    |   |   |   |   |   | √ |
| MYCBP2   |   | √ |   |   | √ |   |
| NAV2     |   |   |   |   |   | √ |
| NCOA3    |   | √ |   |   |   |   |
| NF1      |   |   | √ |   |   |   |
| NIPBL    |   | √ |   |   |   |   |
| NUMA1    |   | √ |   |   |   |   |
| NUP153   |   | √ |   |   |   |   |
| NUP98    | √ |   |   |   |   |   |
| PALLD    |   |   |   |   |   | √ |
| PHF16    |   |   |   |   |   | √ |
| PHF3     |   | √ |   |   |   |   |
| PPFIA1   |   | √ |   |   |   |   |
| PPP1R12A | √ |   |   |   |   |   |
| PRKD2    |   | √ |   |   |   |   |

|         |   |   |   |   |  |   |
|---------|---|---|---|---|--|---|
| PTK2    |   |   |   |   |  | √ |
| RAD50   |   | √ |   |   |  |   |
| RAPGEF6 |   | √ |   |   |  |   |
| RB1     | √ | √ | √ | √ |  |   |
| RBM15   |   |   |   |   |  | √ |
| RNF20   | √ | √ |   |   |  |   |
| SAFB    |   |   |   |   |  | √ |
| SASH1   |   |   |   |   |  | √ |
| SCML1   | √ |   |   |   |  |   |
| SF1     | √ |   |   |   |  |   |
| SH2D4A  |   |   |   |   |  | √ |
| SSFA2   |   |   |   |   |  | √ |
| STMN1   |   |   |   |   |  | √ |
| TACC3   |   |   |   |   |  | √ |
| TERF2   |   | √ |   |   |  |   |
| TFPT    |   |   |   |   |  | √ |
| TOP2B   | √ | √ |   |   |  |   |
| TPX2    |   |   |   |   |  | √ |
| TRIM47  | √ |   |   |   |  |   |
| TTK     |   |   |   | √ |  |   |
| ULK1    |   | √ |   | √ |  |   |
| WDR44   |   | √ |   |   |  |   |
